# Supplementary material for: Nanoparticle-supported and magnetically recoverable organic–inorganic hybrid copper(ii) nanocatalyst: a selective and sustainable oxidation protocol with a high turnover number
Source: Royal Society of Chemistry journal article supplement (doi:10.1039/c4ra06599a), 2014-09-09
Supplement: c4ra06599a1.pdf [file c4ra06599a1.pdf]

## Supporting information

### Nanoparticle-supported and magnetically recoverable organic–inorganic hybrid copper (II) nanocatalyst: a selective and sustainable oxidation protocol with high turnover number

Puran Singh Rathore<sup>a</sup>, Rajesh Patidar<sup>b</sup>, Sonal Thakore<sup>a\*</sup>

<sup>a</sup>Department of Chemistry, Faculty of Science,

The M. S. University of Baroda, Vadodara, 390002, India

<sup>b</sup>Analytical Discipline and CIF, Central Salt and Marine Chemicals Research Institute (CSIR-CSMCRI), G. B. Marg, Bhavnagar, 364002, Gujarat, India

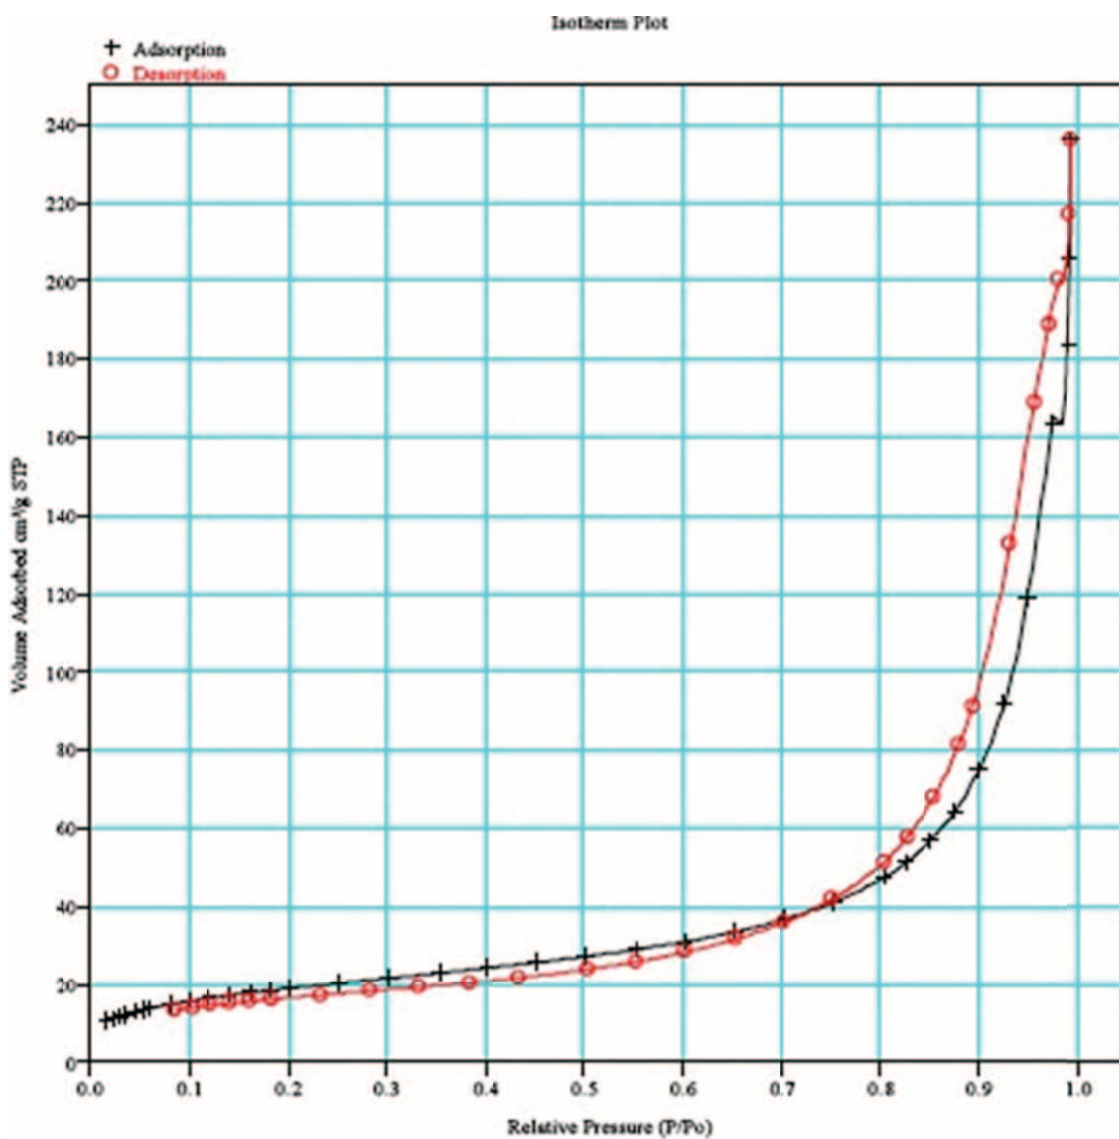

Fig. S1 BET Isotherm Plot for Fe<sub>3</sub>O<sub>4</sub>-LD-Cu nanocatalyst

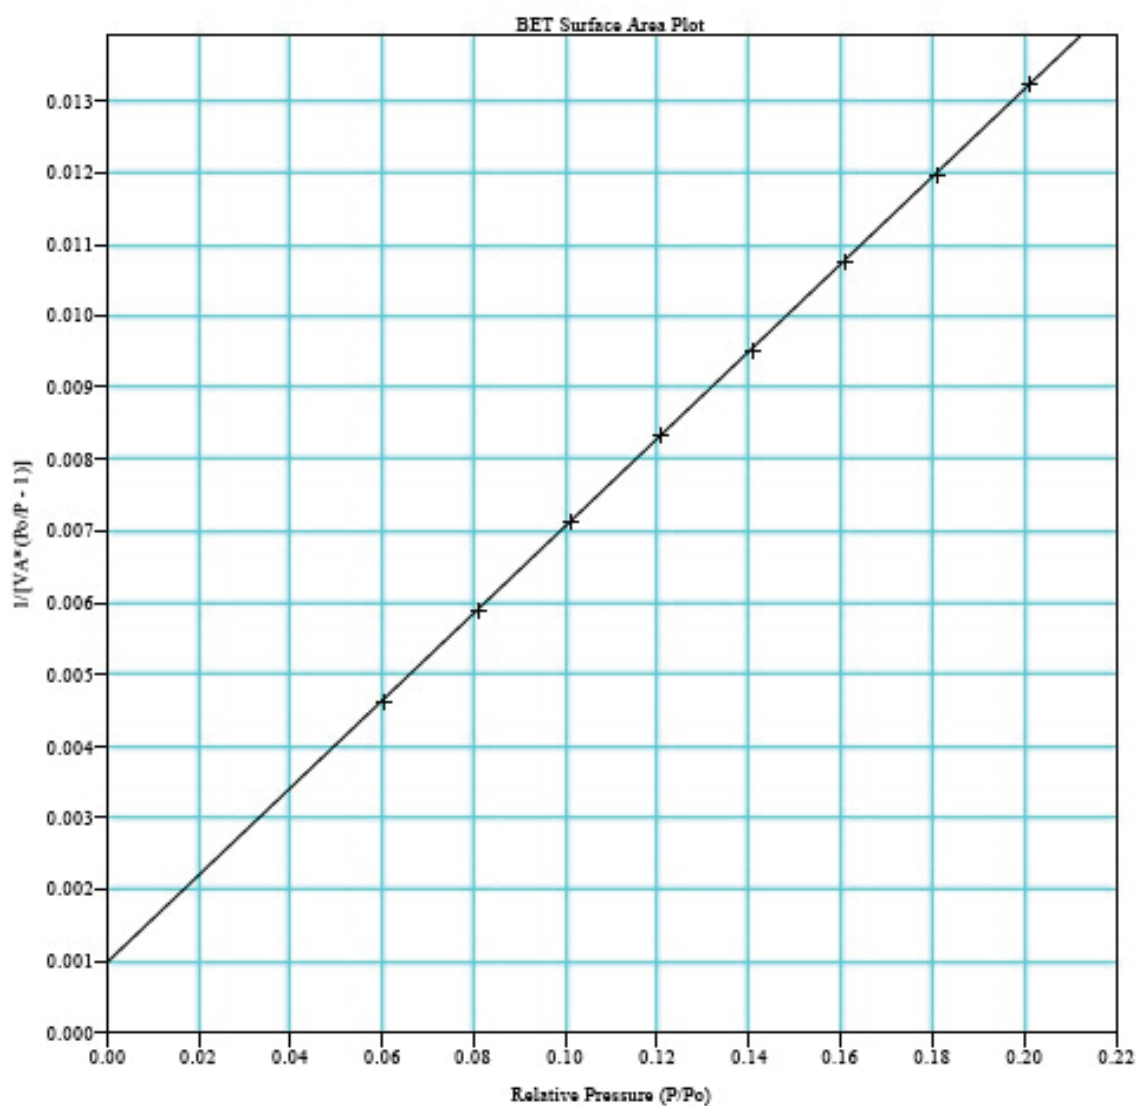

Fig. S2 BET Surface area Plot for Fe<sub>3</sub>O<sub>4</sub>-LD-Cu nanocatalyst

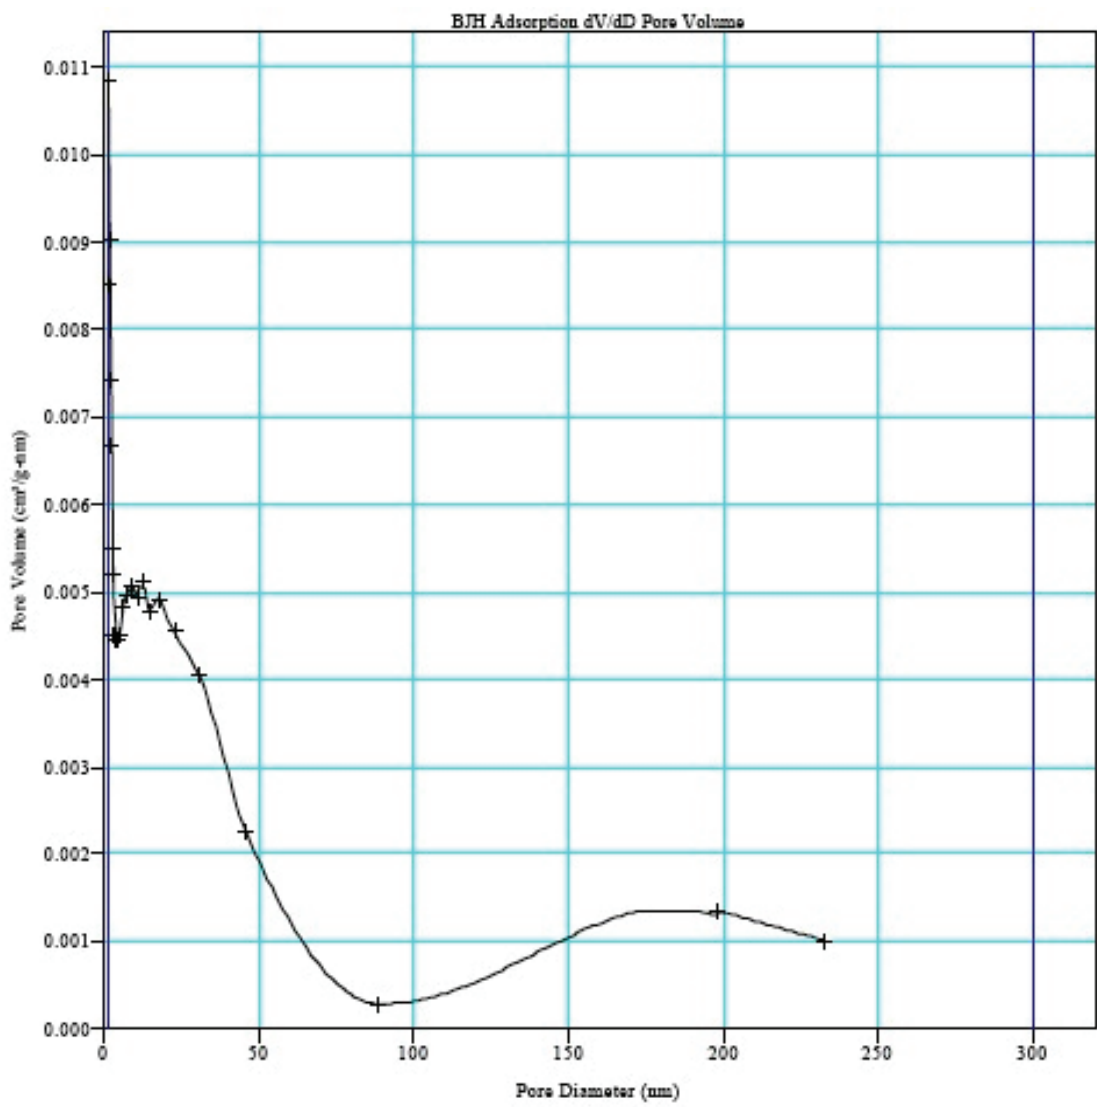

Fig. S3 BJH Adsorption dV/dD Pore Volume for Fe<sub>3</sub>O<sub>4</sub>-LD-Cu nanocatalyst

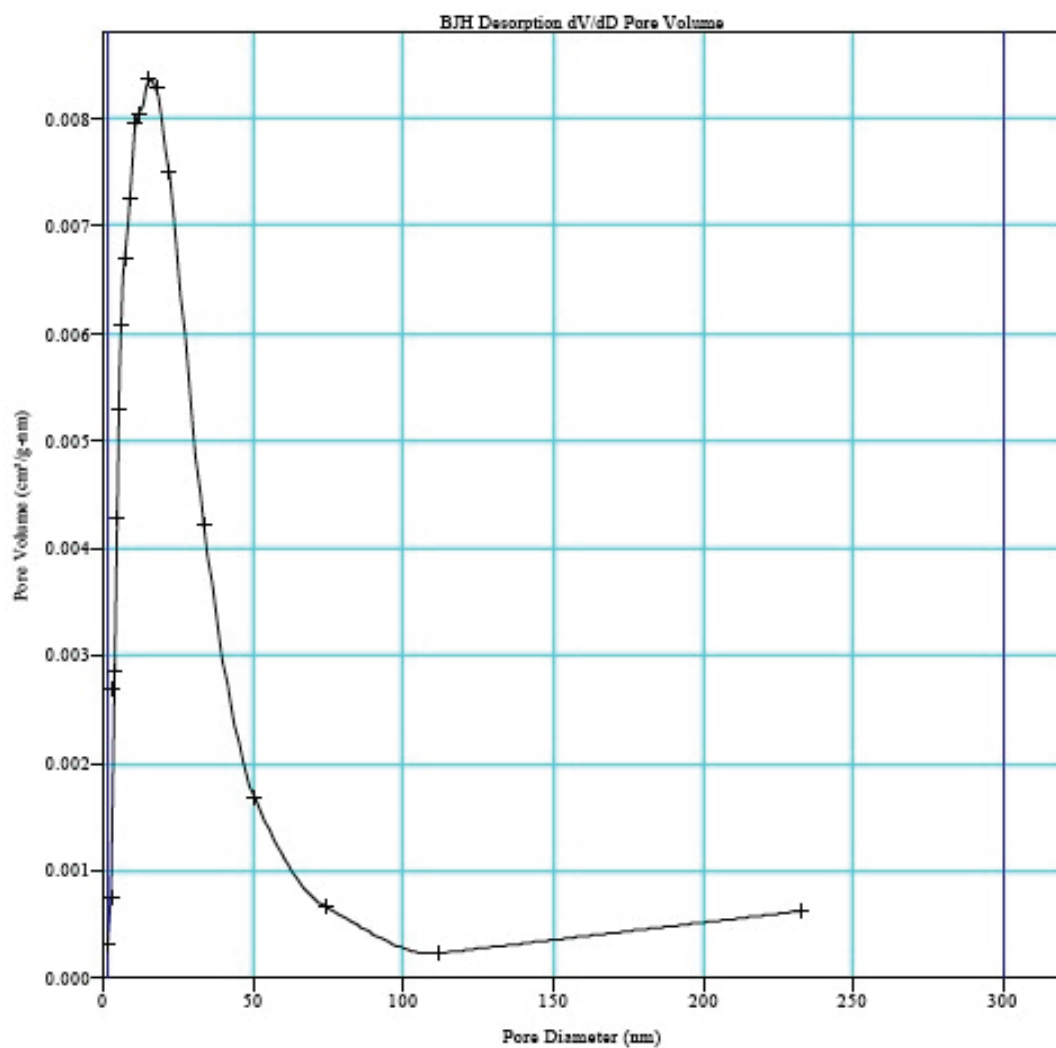

Fig. S4 BJH Desorption dV/dD Pore Volume for Fe<sub>3</sub>O<sub>4</sub>-LD-Cu nanocatalyst

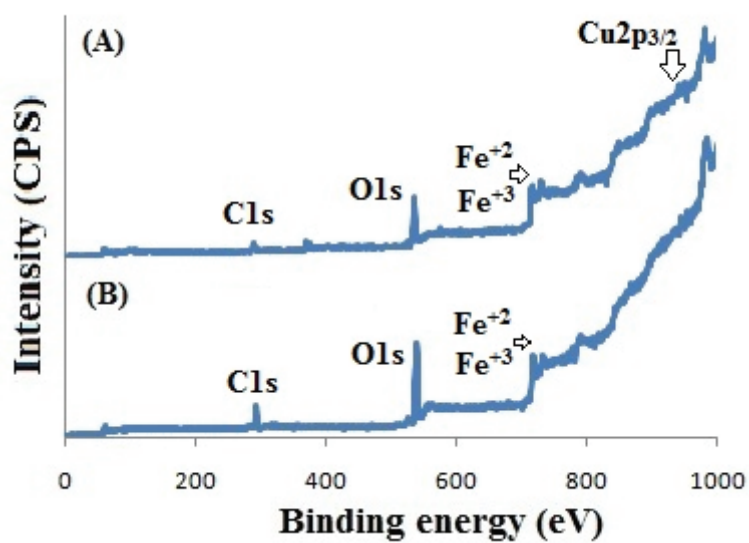

Fig.S5 XPS analysis of Fe<sub>3</sub>O<sub>4</sub> and Fe<sub>3</sub>O<sub>4</sub>-LD-Cu nanocatalyst

**Table-S1 Oxidation of Benzyl alcohol at different Benzyl alcohol /H<sub>2</sub>O<sub>2</sub> ratios.<sup>a</sup>**

| Entry | Benzyl alcohol /<br>H <sub>2</sub> O <sub>2</sub> (mmol) | T(h) | Yield(±1, by GC) |
|-------|----------------------------------------------------------|------|------------------|
| 1     | 1:1                                                      | 24   | 76               |
| 2     | 1:1.1                                                    | 5    | 95               |
| 3     | 1:1.2                                                    | 12   | 95               |
| 4     | 1:1.4                                                    | 3.0  | 90               |
| 5     | 1:1.5                                                    | 1.5  | 90               |
| 6     | 1:2                                                      | 0.5  | 90               |

(a) All reaction carried out at 70° C by using Fe<sub>3</sub>O<sub>4</sub>-LD-Cu nanocatalyst (25 mg).

**Table-S2 Yield of product at different time interval by oxidation of Benzyl alcohol to benzaldehyde**

| Entry     | Air oxidation <sup>a</sup> |                     | H <sub>2</sub> O <sub>2</sub> oxidation <sup>b</sup> |                     |
|-----------|----------------------------|---------------------|------------------------------------------------------|---------------------|
|           | T (h)                      | Yield(±1, by<br>GC) | T (h)                                                | Yield(±1, by<br>GC) |
| 1         | 0.5                        | 30                  | 0.5                                                  | 40                  |
| 2         | 1                          | 35                  | 1                                                    | 56                  |
| 3         | 1.5                        | 42                  | 1.5                                                  | 68                  |
| 4         | 2                          | 45                  | 2                                                    | 75                  |
| 5         | 2.5                        | 48                  | 2.5                                                  | 80                  |
| 6         | 3                          | 50                  | 3                                                    | 85                  |
| 7         | 3.5                        | 52                  | 3.5                                                  | 89                  |
| 8         | 4                          | 55                  | <b>4</b>                                             | <b>96</b>           |
| 9         | 4.5                        | 58                  | 4.5                                                  | 96                  |
| <b>10</b> | <b>5</b>                   | <b>60</b>           | 5                                                    | 96                  |
| 11        | 5.5                        | 60                  | 5.5                                                  | 96                  |
| 12        | 6                          | 60                  | 6                                                    | 96                  |

(a) All reaction carried out at 25-30 °C by using Fe<sub>3</sub>O<sub>4</sub>-LD-Cu nanocatalyst (25 mg) and air as oxidant. (b) All reaction carried out at 70 °C by using Fe<sub>3</sub>O<sub>4</sub>-LD-Cu nanocatalyst (25 mg) and H<sub>2</sub>O<sub>2</sub> as oxidant (Benzyl alcohol: H<sub>2</sub>O<sub>2</sub> (30% v/v) mole ratio = 1: 1.1)

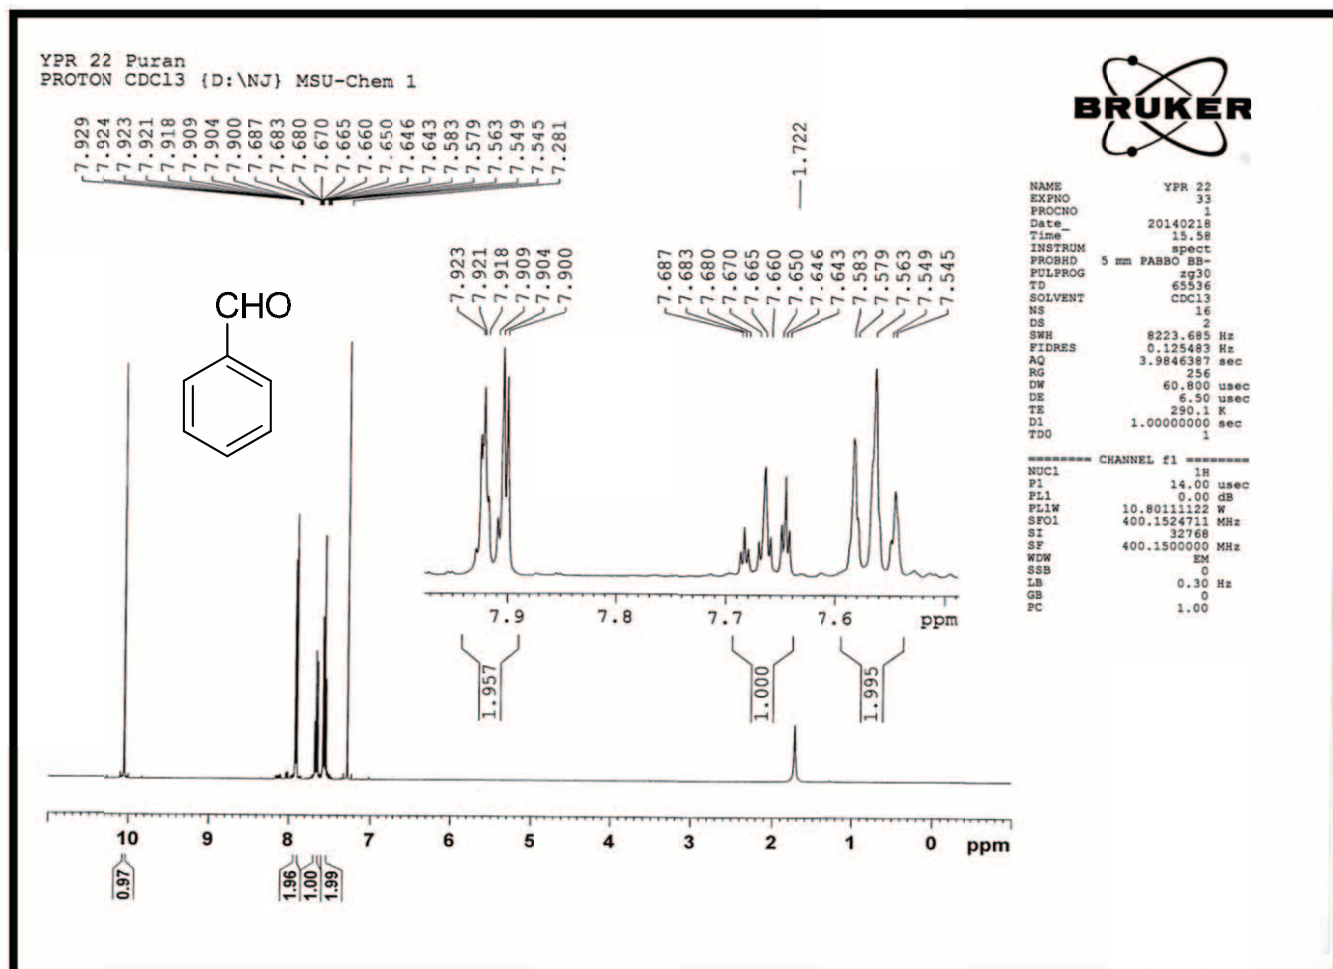

Fig. S6 <sup>1</sup>HNMR spectra of benzaldehyde (CDCl<sub>3</sub>, Table-2, Entry-1)

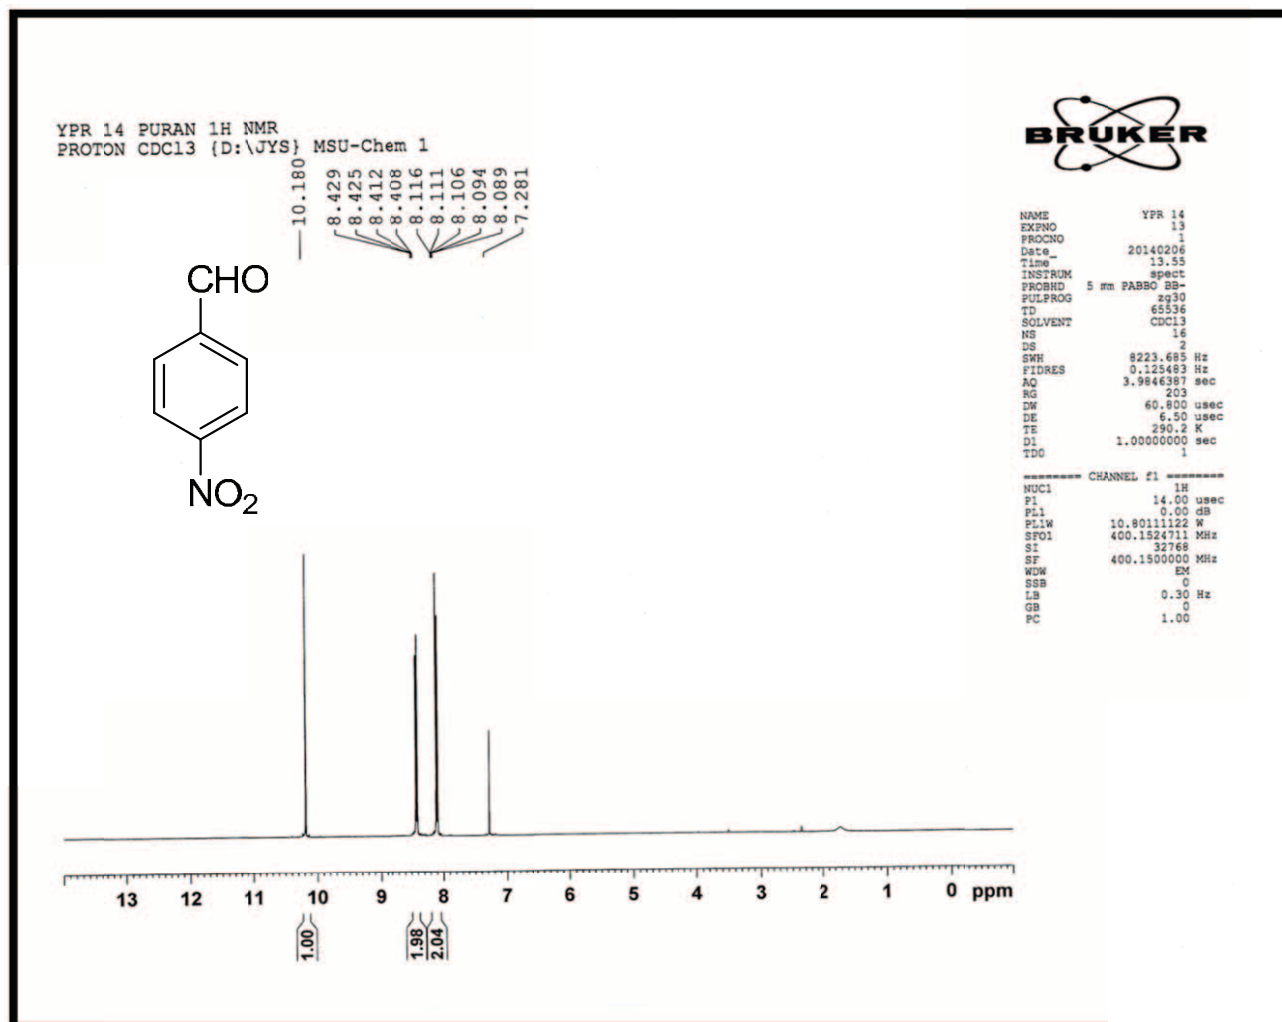

Fig. S7 <sup>1</sup>H NMR spectra of 4-nitrobenzaldehyde (CDCl<sub>3</sub>, Table-2, Entry-2)

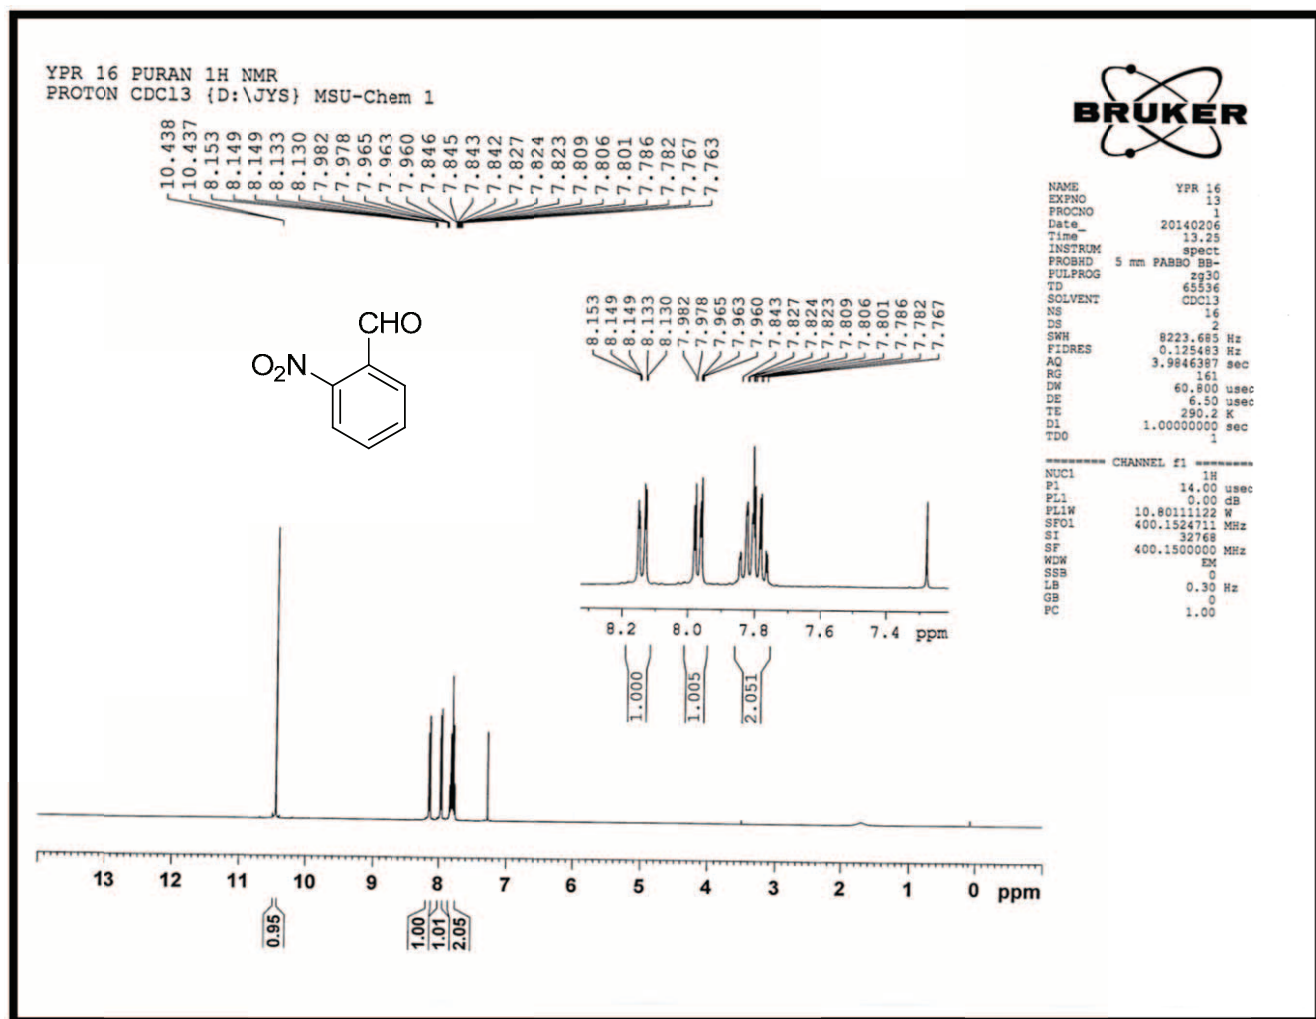

Fig. S8 <sup>1</sup>H NMR spectra of 2-nitrobenzaldehyde (CDCl<sub>3</sub>, Table-2, Entry-3)



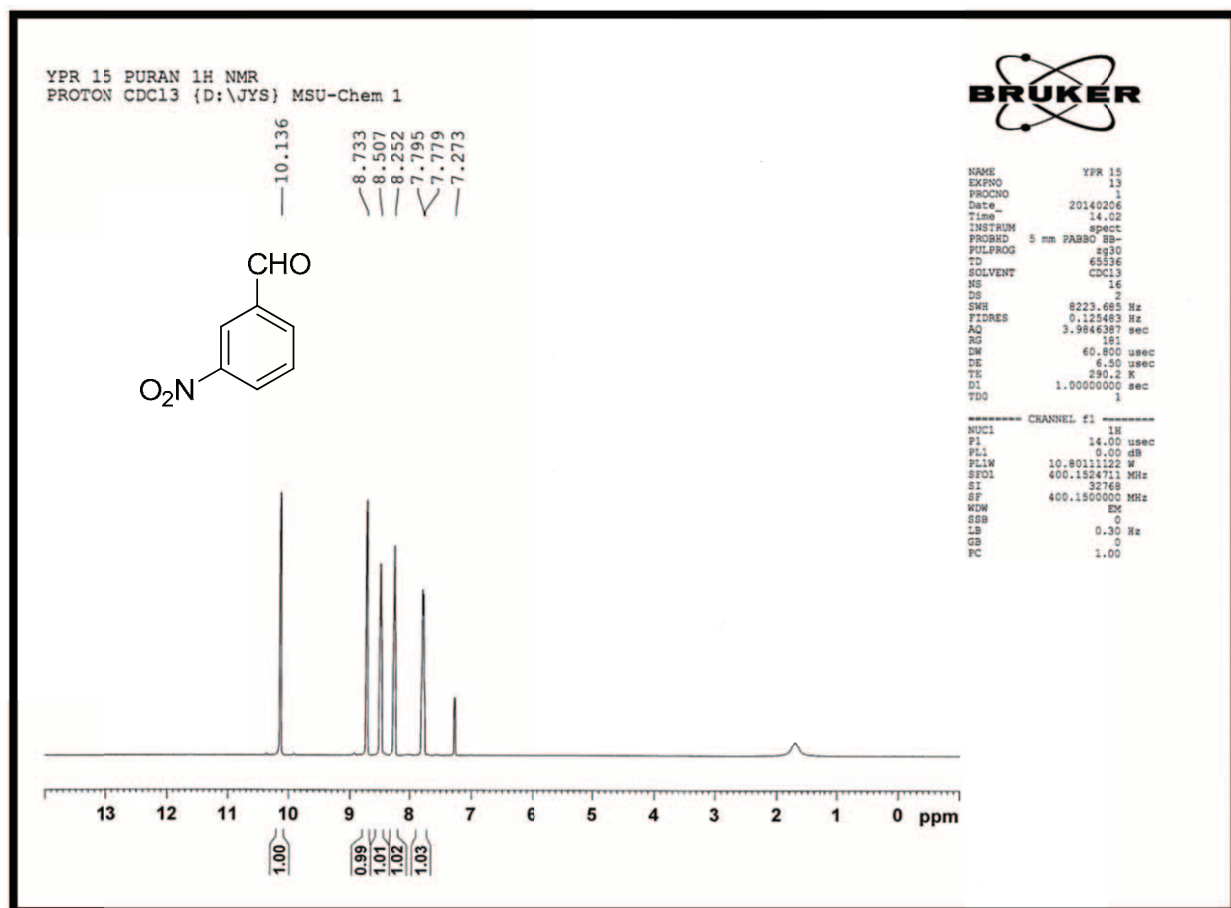

Fig. S9 <sup>1</sup>H NMR spectra of 3-nitrobenzaldehyde (CDCl<sub>3</sub>, Table-2, Entry-4)

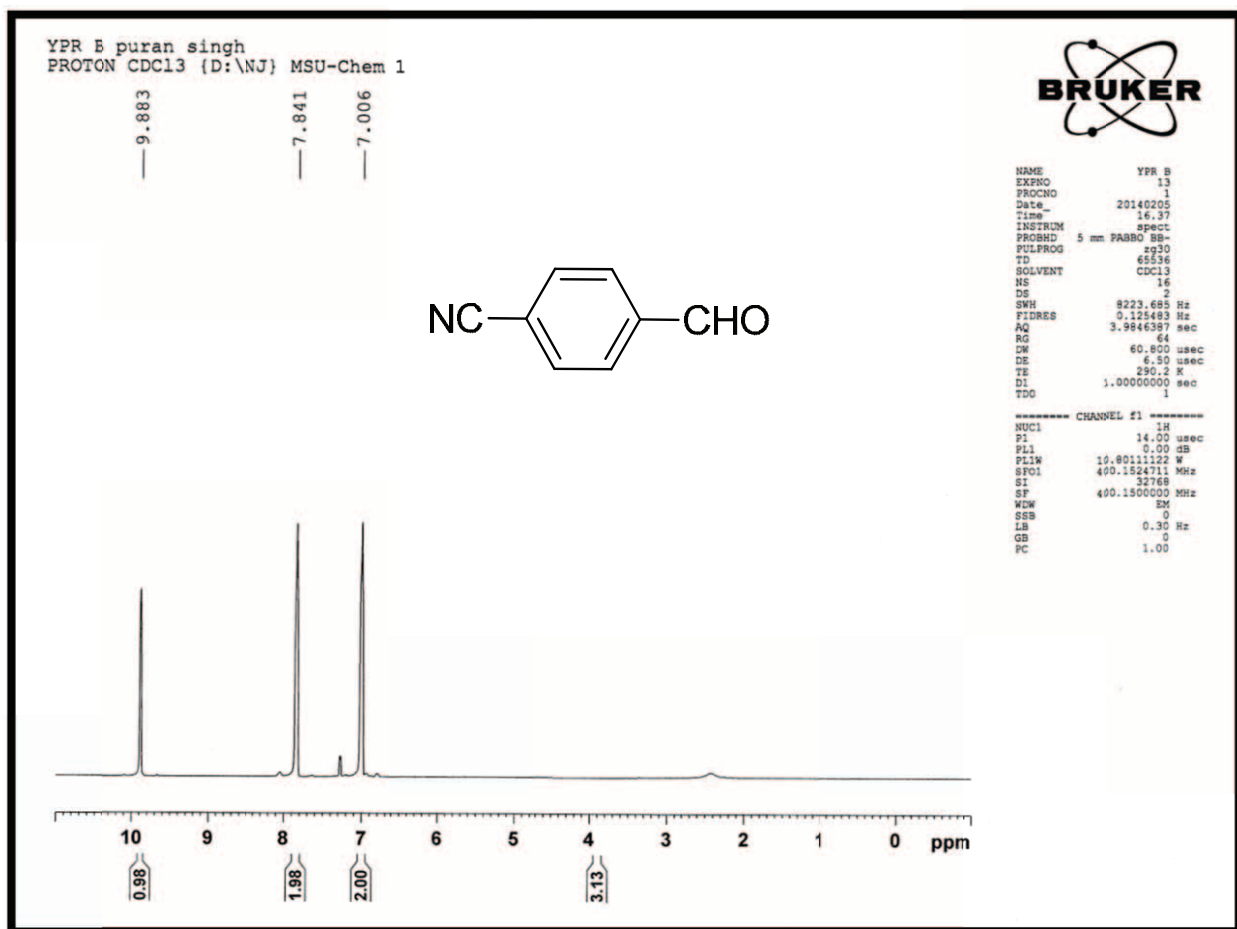

Fig. S10 <sup>1</sup>HNMR spectra of 4-cyanobenzaldehyde (CDCl<sub>3</sub>, Table-2, Entry-5)

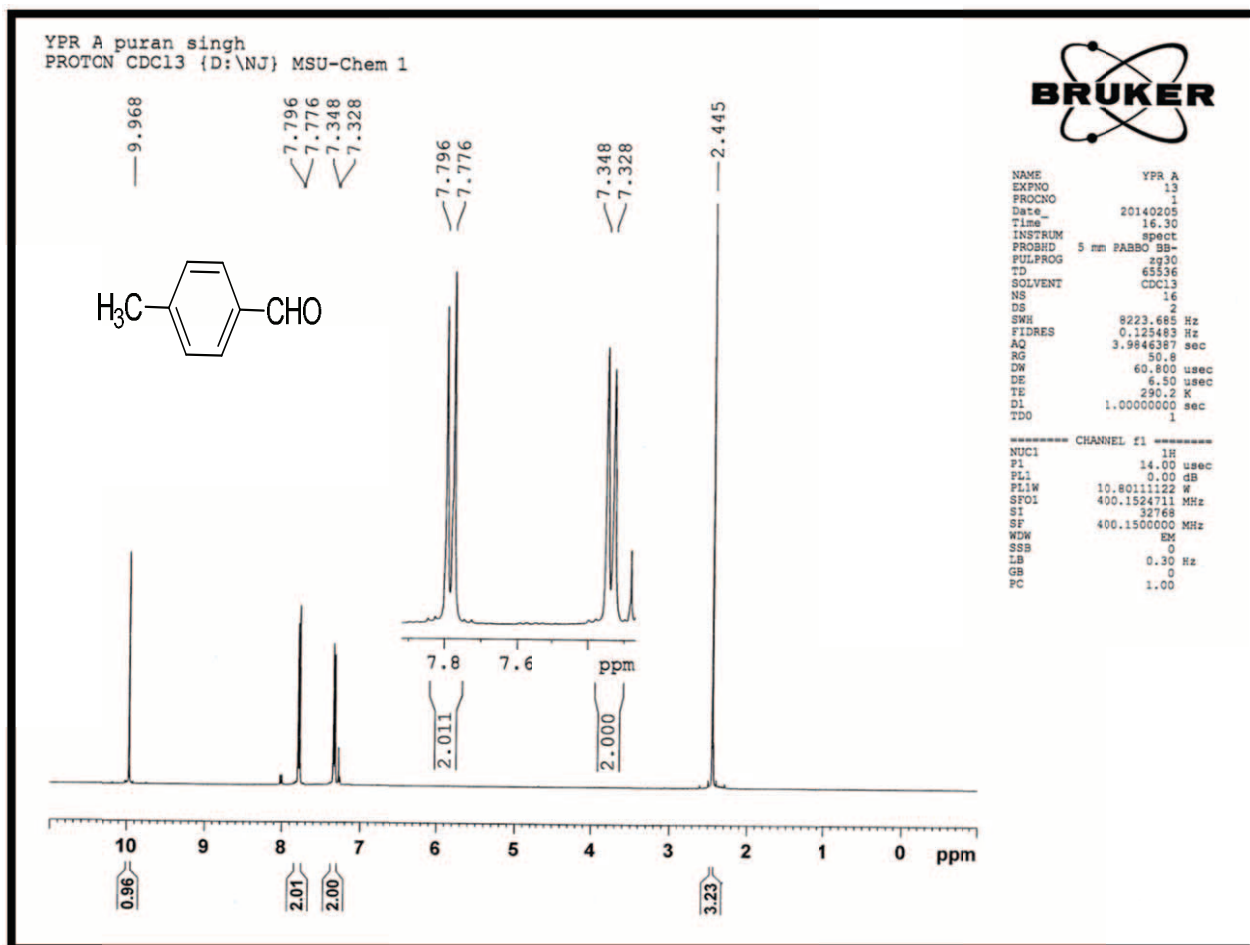

Fig. S11 <sup>1</sup>H NMR spectra of 4-methylbenzaldehyde (CDCl<sub>3</sub>, Table-2, Entry-6)

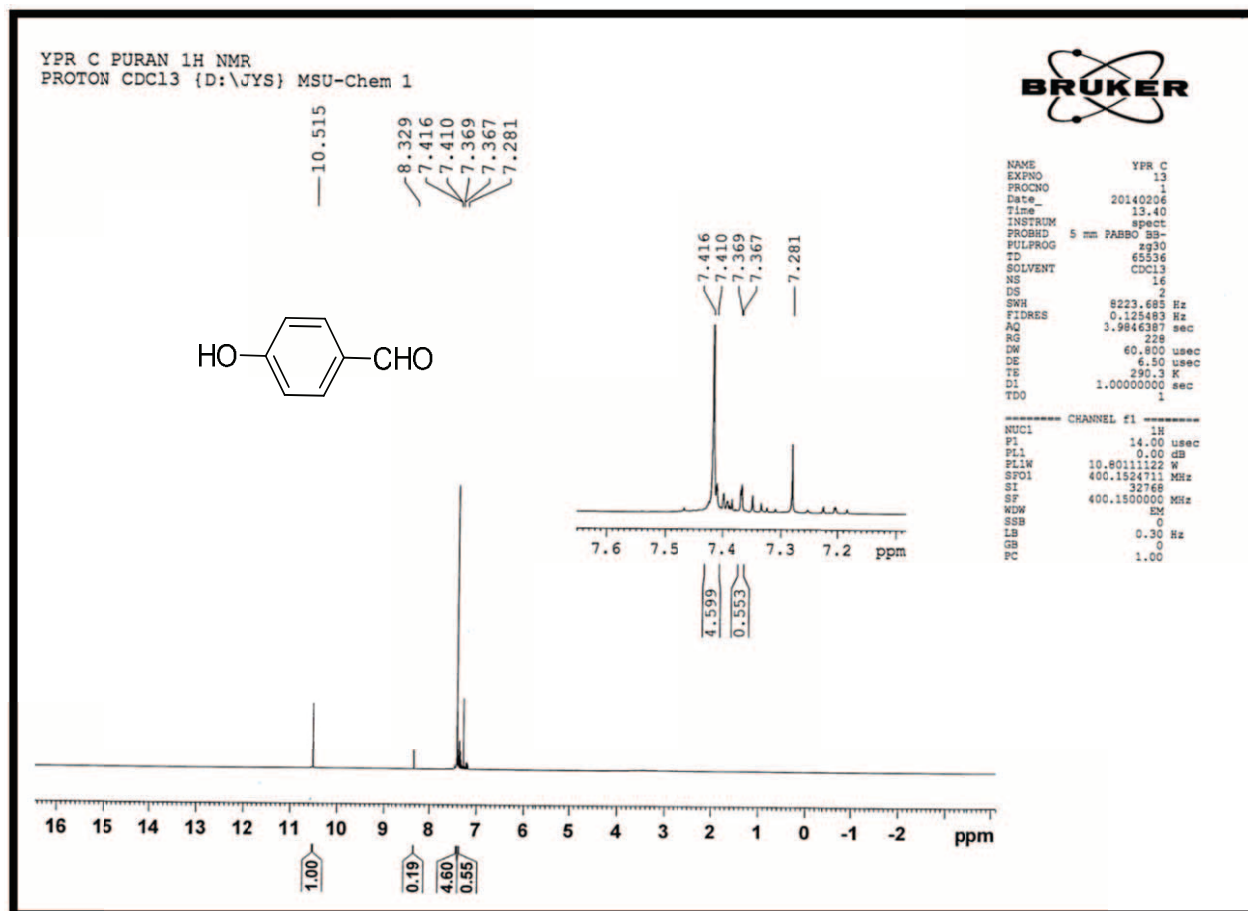

Fig. S12 <sup>1</sup>H NMR spectra of 4-hydroxybenzaldehyde (CDCl<sub>3</sub>, Table-2, Entry-7)

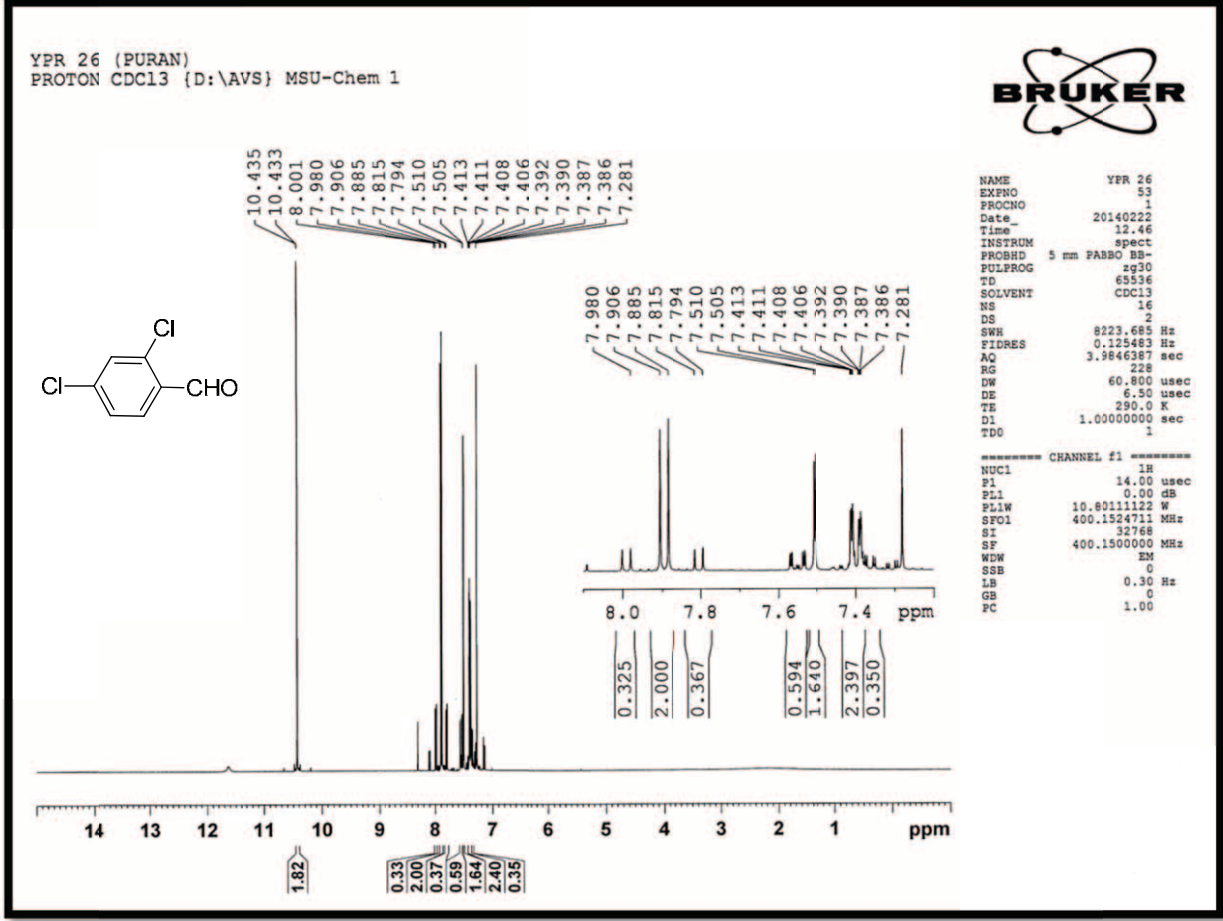

Fig. S13 <sup>1</sup>H NMR spectra of 2,4-dichlorobenzaldehyde (CDCl<sub>3</sub>, Table-2, Entry-8)

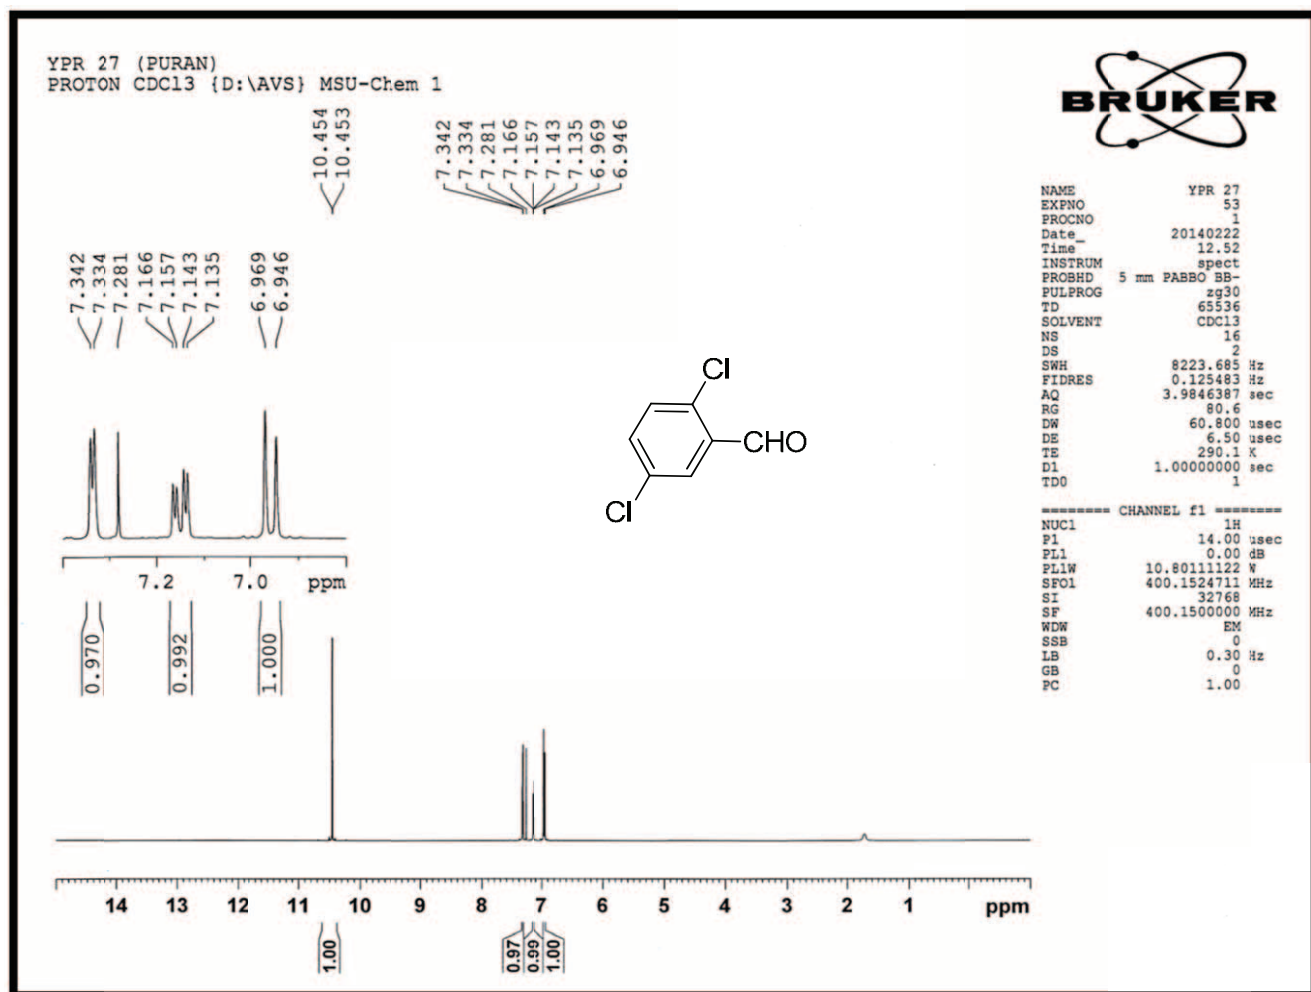

Fig. S14 <sup>1</sup>H NMR spectra of 2,5-dichlorobenzaldehyde (CDCl<sub>3</sub>, Table-2, Entry-9)

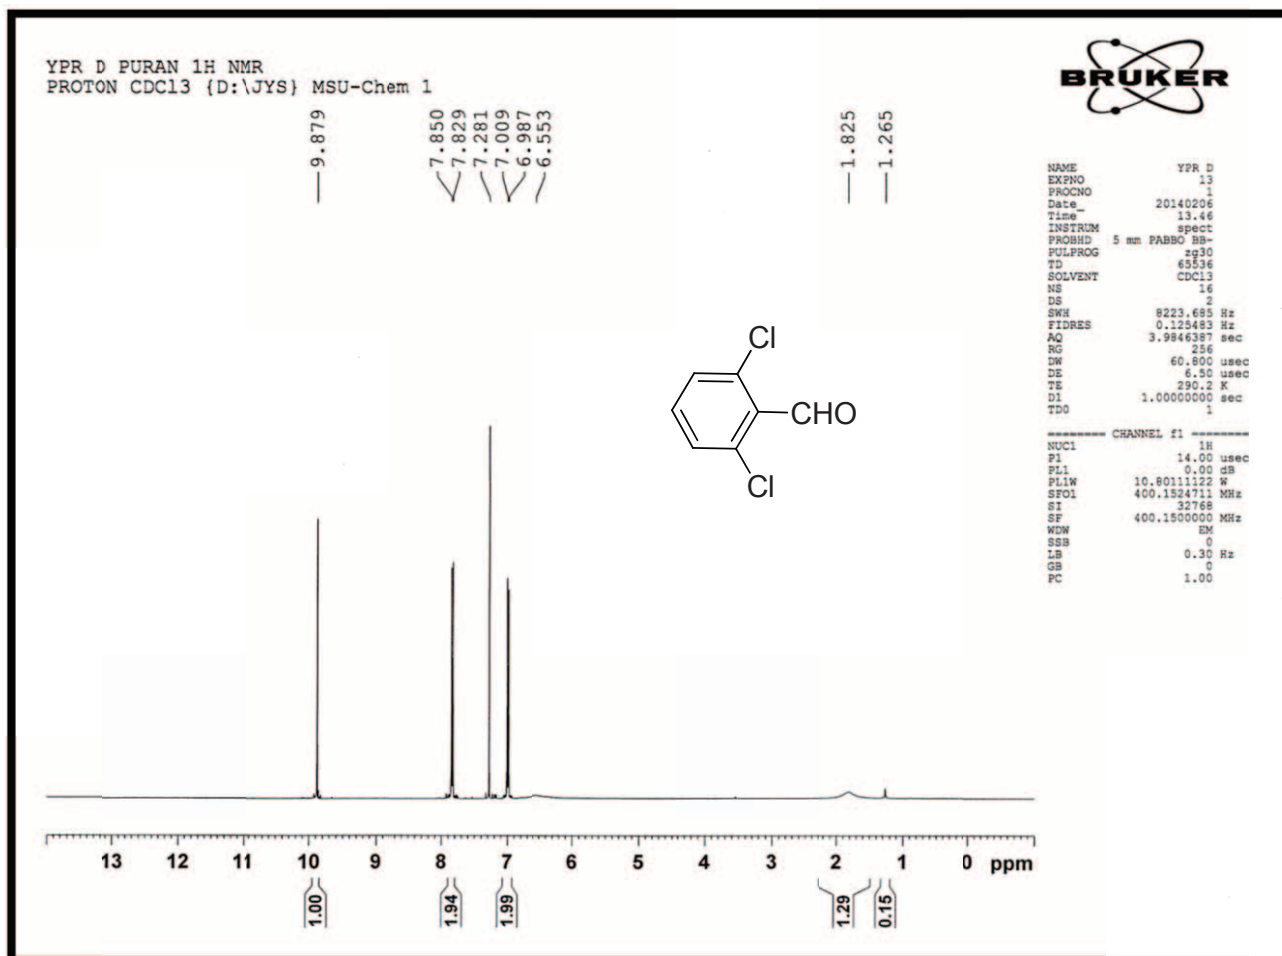

Fig. S15 <sup>1</sup>H NMR spectra of 2,6-dichlorobenzaldehyde (CDCl<sub>3</sub>, Table-2, Entry-10)

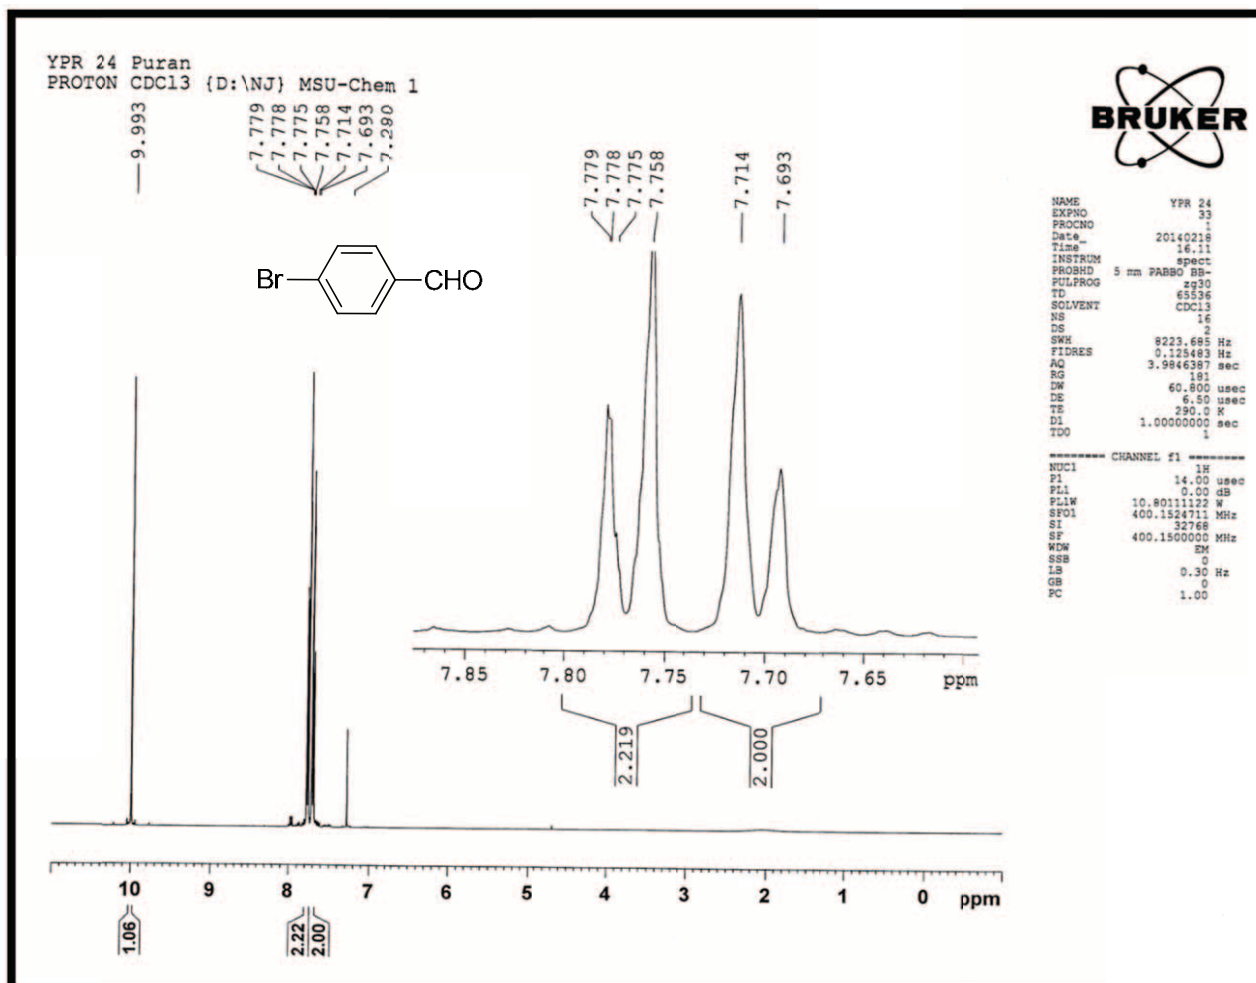

Fig. S16  $^1\text{H}$ NMR spectra of 4-bromobenzaldehyde ( $\text{CDCl}_3$ , Table-2, Entry-11)



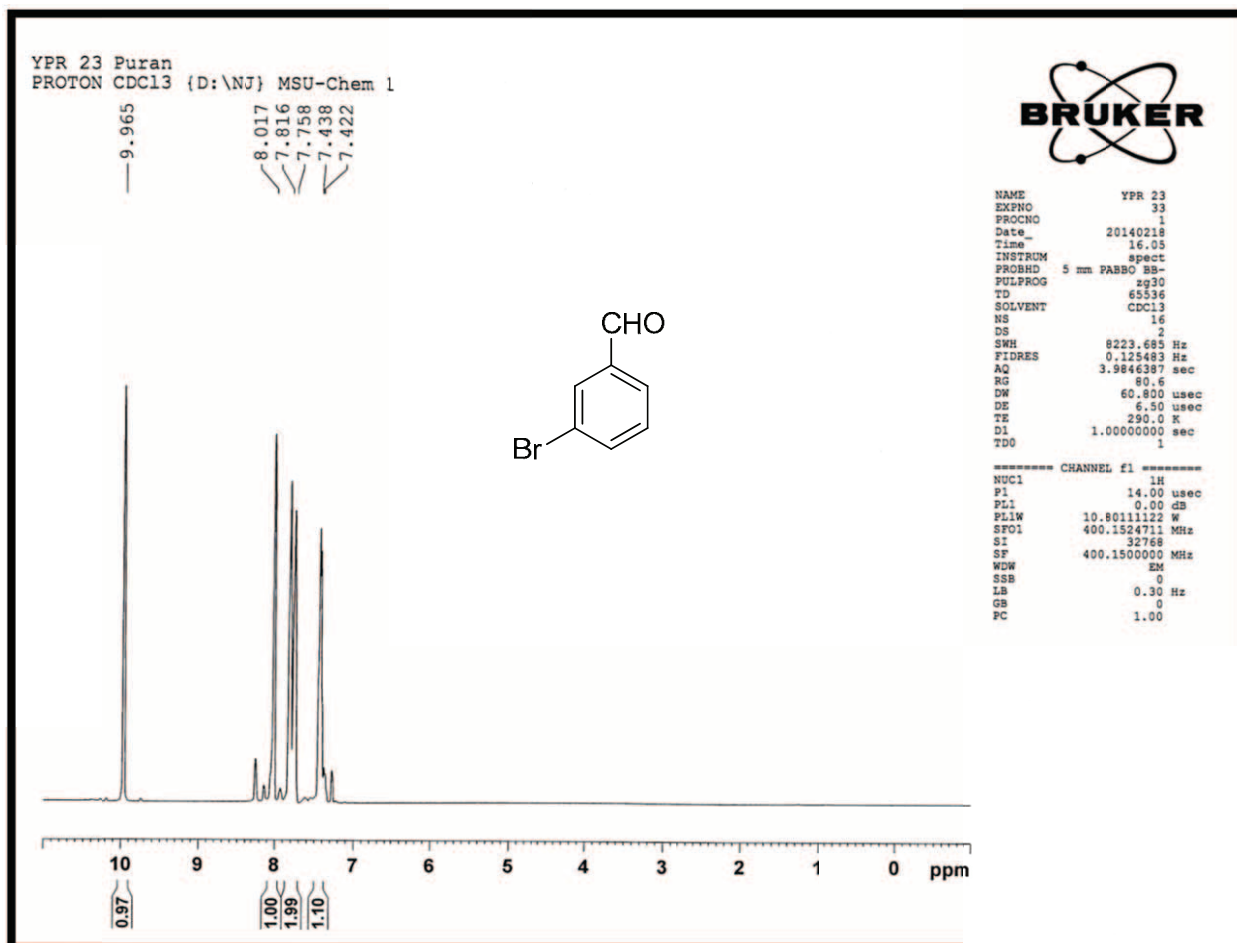

Fig. S17  $^1\text{H}$ NMR spectra of 3-bromobenzaldehyde ( $\text{CDCl}_3$ , Table-2, Entry-12)

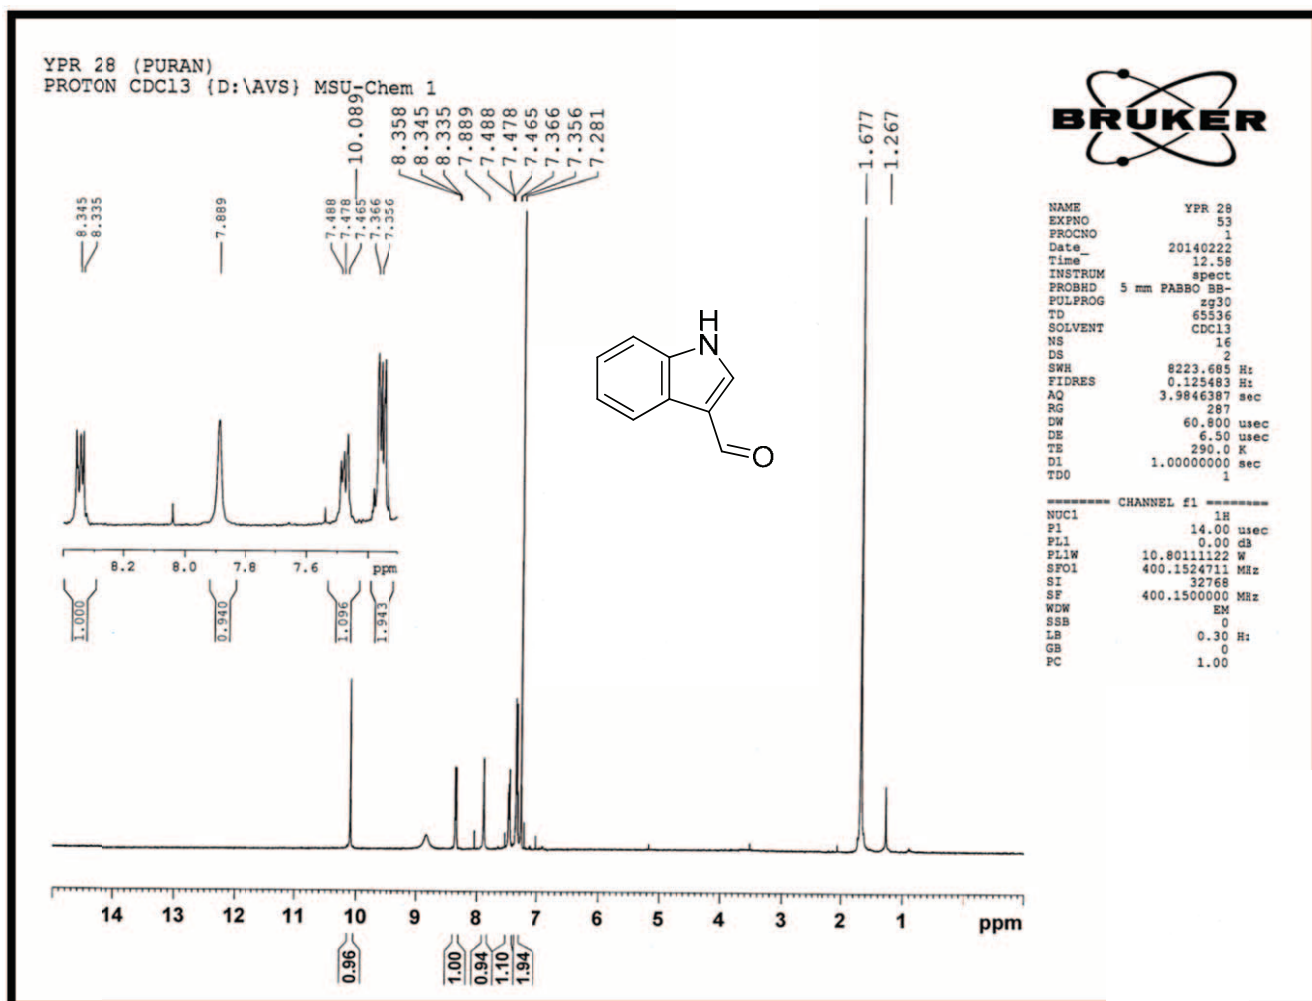

Fig. S18 <sup>1</sup>H NMR spectra of Indole-3-carboxyaldehyde (CDCl<sub>3</sub>, Table-2, Entry-13)
